# Supplementary material
Source: PubMed Central journal article supplement (PMC2605978)

**Figure S1. Pharmacology of purinergic receptors involved in ATP regulation of ENaC in the mouse collecting duct.** Representative continuous current traces from cell-attached patches containing ENaC before and after addition of MRS2365 (**A**), BzATP (**B**), UDP (**C**), and AP<sub>6</sub>A (**D**). In some cases, ATP was subsequently added. Collecting ducts harvested from animals fed a nominally Na<sup>+</sup> free diet. All other conditions are identical to those in fig. 1.

**Figure S2. Direct stimulation of PLC rapidly promotes PI(4,5)P<sub>2</sub> metabolism. A.** Fluorescence micrographs of CHO cells expressing PI(3,4,5)P<sub>3</sub> (top) and PI(4,5)P<sub>2</sub> (bottom) reporters at 1 (1), 5 (2) and 13 (3) minutes after treatment with the PLC activator *m*-3M3FBS. Emission from reporters in/near the membrane isolated with TIRF microscopy. **B.** Summary graph showing the time course of relative plasma membrane PI(3,4,5)P<sub>3</sub> and PI(4,5)P<sub>2</sub> metabolism in CHO cells in response to *m*-3M3FBS.

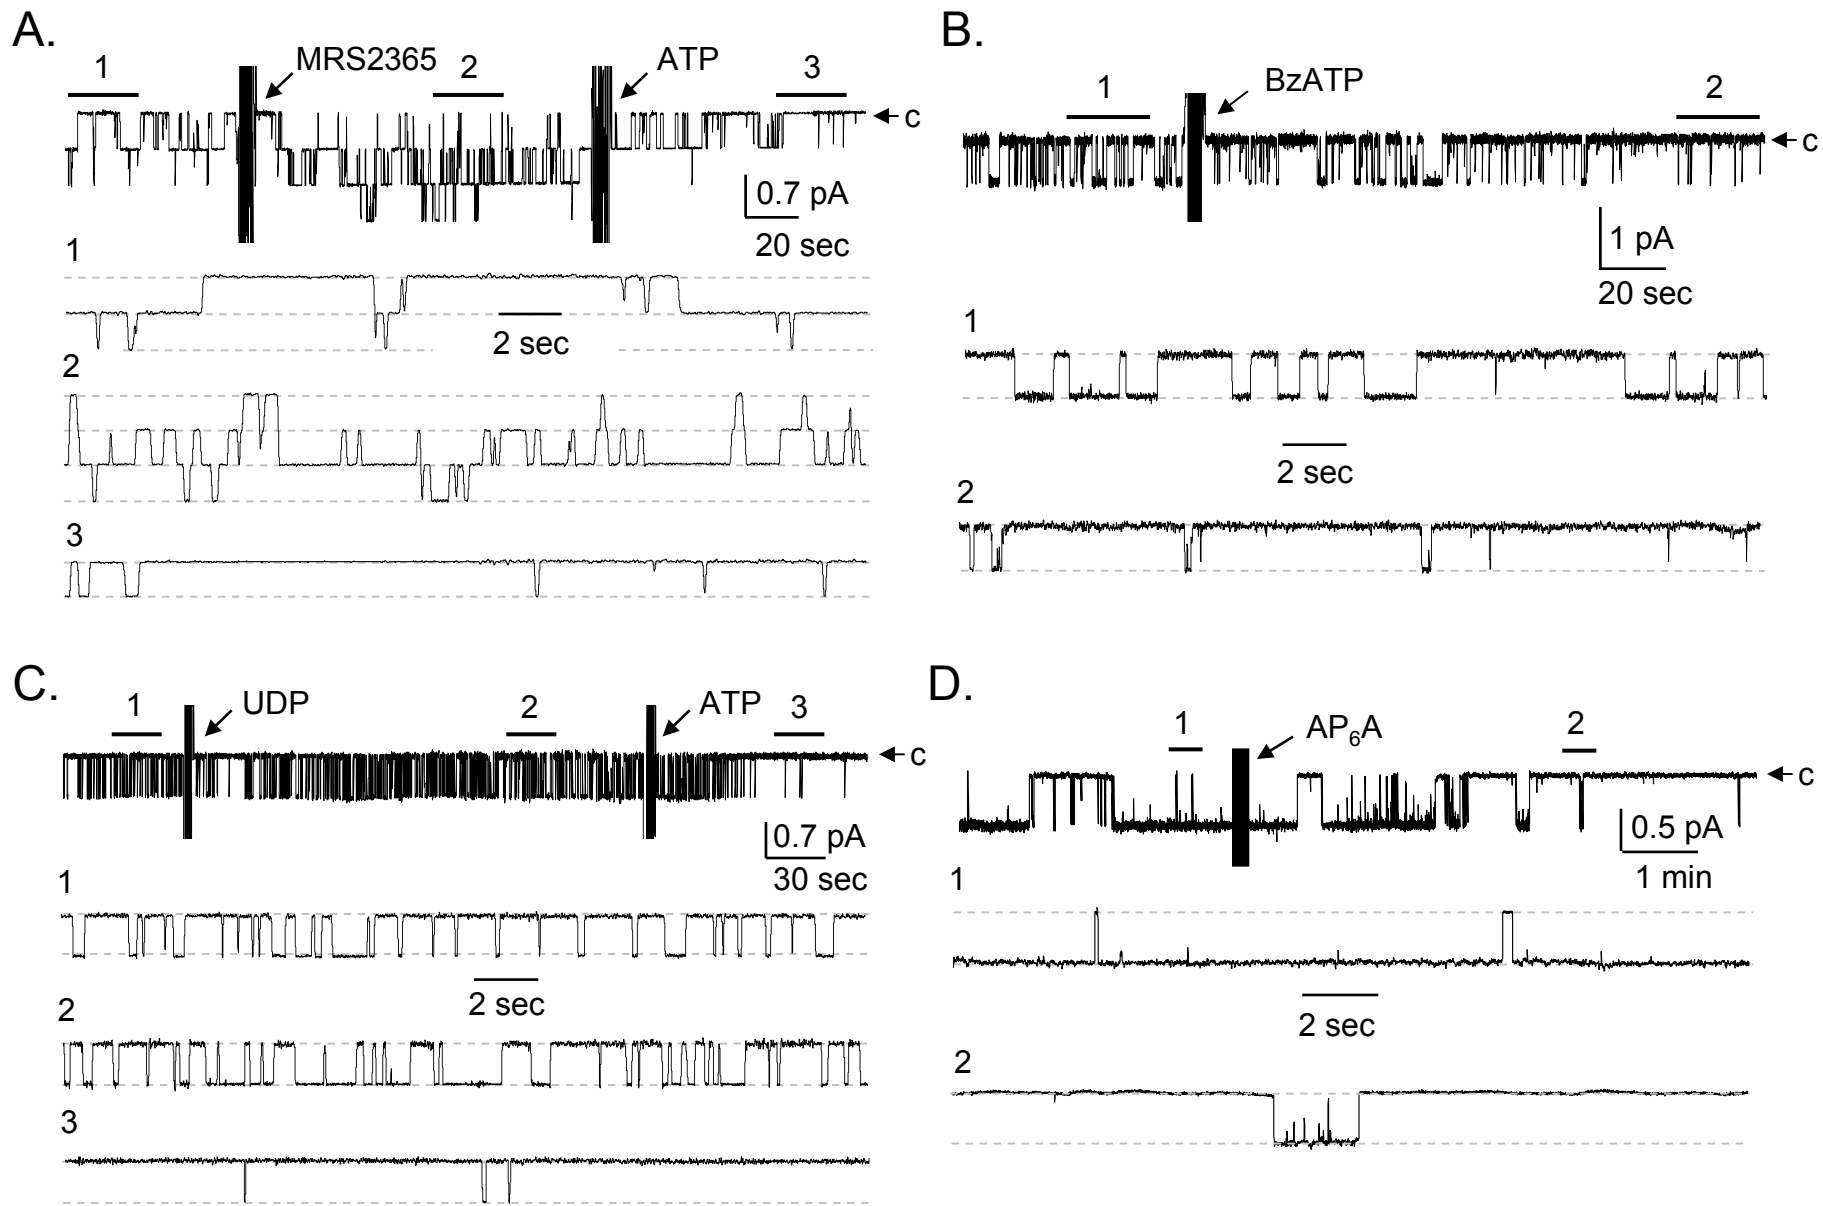

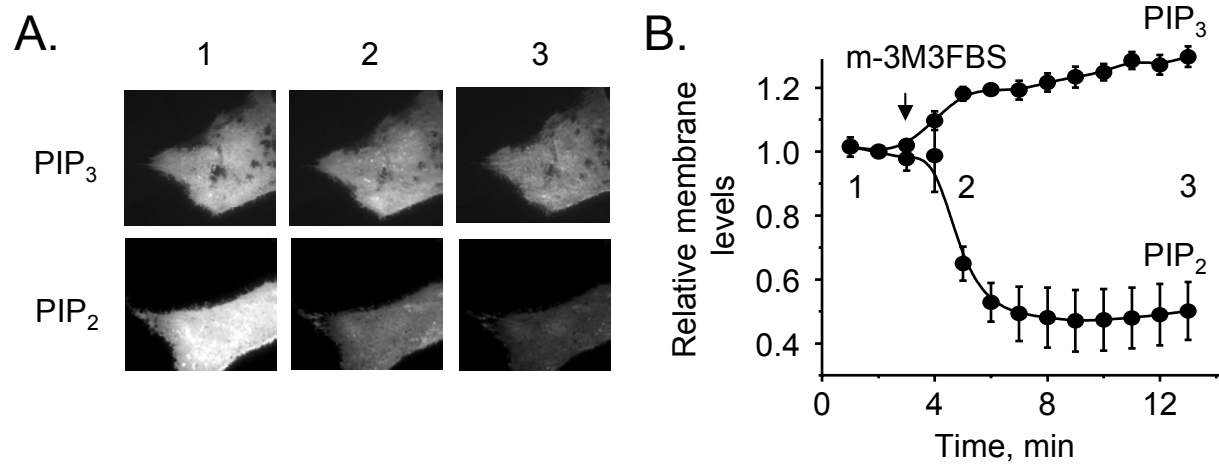

Supplement: M807129200_1.pdf [file M807129200_1.pdf]
